# Supplementary material for: 1H, 13C, 15N backbone assignment of the minimally tied trefoil knot, MTTSA, a 23s rRNA SPOUT methyltransferase
Source: Biomol NMR Assign. 2026 Apr 10;20(1):16. doi: 10.1007/s12104-026-10262-9 (PMC13068757; doi:10.1007/s12104-026-10262-9)
Supplement: Supplementary file 1 — Supplementary Material 1 [file 12104_2026_10262_MOESM1_ESM.docx]

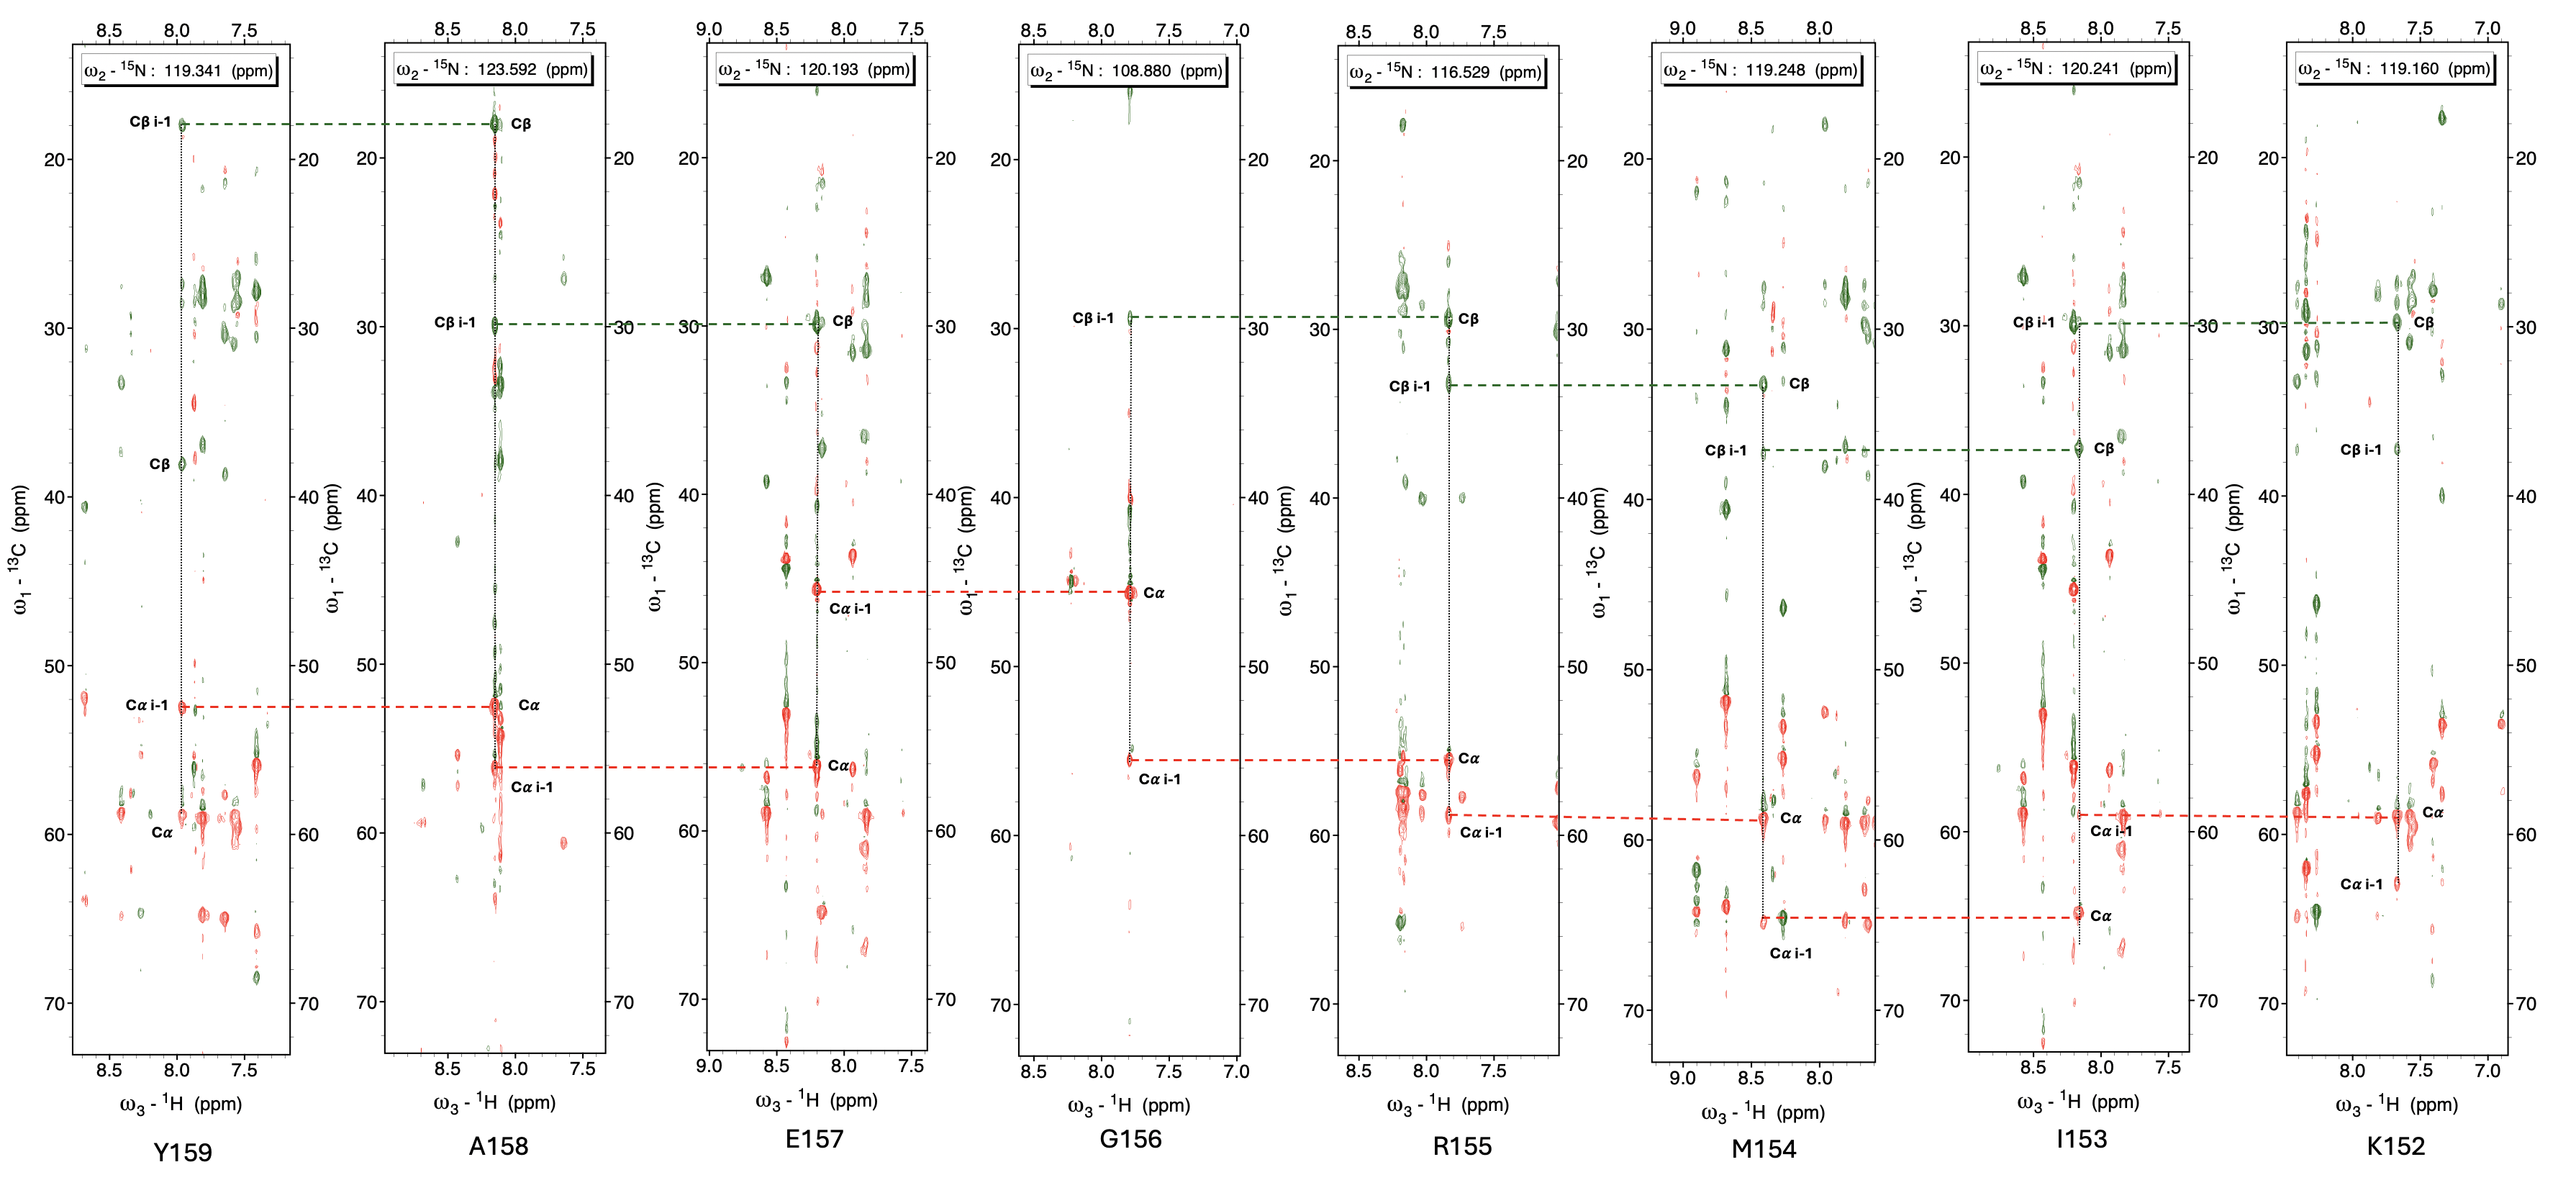


**Supplementary Figure 1**. TROSY-NHCACB spectra stripe plots from K152 to Y159 show backbone assignments strategy of MTTSA.  Each stripe plot has corresponding HN chemical shifts, in which positive signals are colored red, and negative signals are colored green. The stronger peaks represent the current residue chemical shift (Cαi and Cβi ), and weaker peaks represent the preceding residue chemical shift (Cαi-1 and Cβi-1). Backbone assignments are completed by finding identical Cα/Cβ pairs in another HN group.
